# Supplementary material for: Acute Disseminated Encephalomyelitis with Seizures and Myocarditis: A Fatal Triad
Source: PubMed Central journal article supplement (PMC7353866; doi:10.3390/medicina56060277), 2020-06-04
Supplement: medicina-56-00277-s001.pdf [file medicina-56-00277-s001.pdf]

**Table S1. Diagnostics.**

**Bone-marrow puncture:** inconspicuous

**Autoimmunological disorders**

ANA  
c-ANCA  
AK against PR3  
p-ANCA  
Myeloperoxidase  
Complement C3  
Complement C4  
Total complement activity CH50  
Neuronal ab (CSF, serum)  
Ganglioside ab (CSF, serum)  
TSH receptor ab

**Paraneoplastic disorders**

Alpha-fetoprotein  
Beta-HCG

**Microbiology**

Human herpesvirus PCR test  
(including HHV-1, -2, -3, -4, -5, -6)

**Serology:**

Borrelia burgdorferi: IgM and IgG  
C. pneumoniae: IgA and IgG  
C. psittaci: IgA and IgG  
C. burnetii: IgM and IgG  
M. pneumoniae: IgG borderline test result, IgM and IgA  
L. pneumophila: IgM and IgG  
TPHA  
Toxoplasmosis  
C. jejuni: IgA and IgG  
Yersinia: IgM, IgA and IgG  
Leptospira IgM and IgG  
Hantavirus: IgM and IgG  
Sandfly fever virus: IgM and IgG  
Rubulavirus: IgG positive, IgM  
Morbili virus: IgG positive, IgM  
FSME virus: IgM and IgG, IgG ab Liquor  
Rubella virus: IgG positive, IgM  
HIV 1/2 ab + p24Ag  
QuantiFERON TB gold plus test: not determinable

}  
negative

}  
without

**Serum antibodies (IIFT)**

Borna disease: IgM/ IgG  
Sandfly fever virus  
Usutu virus: IgM/ IgG  
Rickettsia typhi  
Naegleria fowleri  
Rabies virus  
16S rDNA PCR  
18S rDNA PCR

}  
negative

**CSF**

Meningitis-multiplex-PCR (BIOFIRE FILMARRAY ME Panel)  
Human herpesvirus PCR test  
(including HHV-1, -2, -3, -4, -5, -6)  
16S rDNA PCR  
Borrelia  
JC virus DNA  
Borrelien-Serology  
18S PCR  
Flavivirus  
VSBV-1 (variegated Squirrel Bornavirus)  
BoDV-1 (Borna Disease)

}  
negative

**Anti-Neuronal Antibodies IgG (IFT)**

Anti

-Aquaporin-4  
-Glutamat-Rezeptors (Typ NMDA)  
-CASPR2  
-Hu  
-Ri  
-ANNA-3  
-Yo  
-Tr/DNER  
-Myelin  
-Ma/ta  
-GAD65  
-Amphysin  
-GABA-b-Rezeptors  
-LGI1  
-CARPVIII  
-Glycin-Rezeptors  
-mGluR1  
-mGluR5  
-GABA-a-Rezeptors  
-Rho GTPase activating protein 26  
-Recovirus  
-GluRD2  
-Flotilin  
-ITPR1  
-Homer3  
-Neurochondrin

}  
negative

**Nested-PCR from lung, heart and brain tissue**

Echovirus  
Parvovirus B19  
Humane Herpes virus 6, 7, 8  
Epstein Barr Virus  
Adenovirus  
Human Cytomegalovirus  
Herpes simplex 1 and 2 virus  
Varizella zoster virus  
Toxoplasma gondii  
Borrelia burgdorferi

}  
negative

Abbreviations: CSF = cerebrospinal fluid, ab = Antibodies, Ag = antigene
